# Supplementary material for: A Systematic Literature Review and Meta-Analysis of Entrepreneurial Personality
Source: publisher site journal article supplement (doi:10.1515/erj-2021-0322), 2021-12-03
Supplement: Supplementary file 1 [file j_erj-2021-0322_suppl_002.docx]

**Supplemental Material B – Average Cronbach’s Alphas**

Supplemental Material B presents the average Cronbach’s alphas from the current meta-analytic database. These average Cronbach’s alphas were used to correct for unreliability in the meta-analytic results using an artifact distribution method. More information regarding the process to correct for unreliability can be found in the Methods section of the primary text.

1. Innovativeness - .76
2. Risk-Taking - .72
3. Achievement Orientation - .76
4. Locus of Control - .72
5. Proactiveness - .75
6. Self-Efficacy - .74
7. Autonomy Orientation - .71
8. Aggregate Scores - .81
9. Entrepreneurial Attitude - .79
10. Entrepreneurial Intent - .85
11. Entrepreneurial Status - 1.00
12. Performance - .82
