# Supplementary material for: A Systematic Literature Review and Meta-Analysis of Entrepreneurial Personality
Source: publisher site journal article supplement (doi:10.1515/erj-2021-0322), 2021-12-03
Supplement: Supplementary file 2 [file j_erj-2021-0322_suppl_004.docx]

**Supplemental Material D – Three-Level Meta-Analytic Results, Weight-Function Model Analysis Results, as well as Outlier and Influential Case Results**

Supplemental Material D presents the three-level meta-analytic results, weight-function model analysis results, as well as the outlier and influential case results. The full document includes four pages for each relationship tested within the current article, resulting in 212 pages of analyses. The submission manager would not allow the full version to be uploaded, but this document can be provided upon request.
